# Supplementary material for: Predictive language comprehension in Parkinson’s disease
Source: PubMed Central journal article supplement (PMC9907838; doi:10.1371/journal.pone.0262504), 2023-02-08
Supplement: pone.0262504.s001.pdf [file pone.0262504.s001.pdf]

**S1 Table. Norming Studies Participant Demographics.**

| Variable                | <i>M</i> (SD)                                       |                                                      | t-tests                        |
|-------------------------|-----------------------------------------------------|------------------------------------------------------|--------------------------------|
|                         | 95% Confidence Interval [Lower, Upper]              |                                                      |                                |
|                         | Range                                               |                                                      |                                |
| <i>Study 1</i>          | <i>Younger-old</i>                                  | <i>Older-old</i>                                     |                                |
| <b>Age (yrs.)</b>       | <b>60.64</b> (6.31)<br>[57.00, 64.28]<br>52 - 68    | <b>75.46</b> (3.84)<br>[73.14, 77.78]<br>70 - 80     | $t(25) = -7.30,$<br>$p < .001$ |
| <b>Education (yrs.)</b> | <b>17.64</b> (3.27)<br>[15.75, 19.53]<br>14 - 27    | <b>17.58</b> (2.10)<br>[16.25, 18.92]<br>13 - 21.5   | $t(25) = 0.05,$<br>$p = .957$  |
| <b>MoCA (/30)</b>       | <b>28.14</b> (1.41)<br>[27.33, 28.95]<br>25 - 30    | <b>26.62</b> (1.98)<br>[25.42, 27.81]<br>23 - 29     | $t(25) = 2.32,$<br>$p = .029$  |
| <i>Study 2</i>          |                                                     |                                                      |                                |
| <b>Age (yrs.)</b>       | <b>58.41</b> (5.96)<br>[55.34, 61.48]<br>50 - 67    | <b>78.38</b> (5.35)<br>[75.15, 81.62]<br>70 - 87     | $t(28) = -9.50,$<br>$p < .001$ |
| <b>Education (yrs.)</b> | <b>17.94</b> (2.68)<br>[16.56, 19.32]<br>15 - 27    | <b>18.38</b> (2.27)<br>[17.02, 19.75]<br>14.5 - 23   | $t(28) = -0.48,$<br>$p = .635$ |
| <b>MoCA (/100%)</b>     | <b>93.94</b> (4.27)<br>[91.66, 96.21]<br>86.4 - 100 | <b>90.70</b> (5.21)<br>[87.55, 90.70]<br>81.8 - 96.7 | $t(28) = 2.32,$<br>$p = .077$  |

*Note:* In study 1, participants' MoCA scores ranged from 23-30,  $M = 27.41$ ,  $SD = 1.85$ .

In study 2, participants' MoCA percentage scores ranged from 81.8-100%,  $M = 92.49$ ,  $SD = 4.91$ . In the telephone version of the MoCA (norming study 2), a score of 22 = a score of 30 on the in-person version of the MoCA, and the suggested cutoff score for normal cognition is 18 (81.8% correct).
