# Supplementary material for: Predictive language comprehension in Parkinson’s disease
Source: PubMed Central journal article supplement (PMC9907838; doi:10.1371/journal.pone.0262504), 2023-02-08
Supplement: pone.0262504.s002.pdf [file pone.0262504.s002.pdf]

**S2 Table. Neuropsychological Battery.**

| <i>Domain</i>                           | <i>Task Name</i>                                  | <i>Task Description</i>                                                                                                         | <i>Cognitive Skills</i>                                                     |
|-----------------------------------------|---------------------------------------------------|---------------------------------------------------------------------------------------------------------------------------------|-----------------------------------------------------------------------------|
| <i>Executive Function and Attention</i> | D-KEFS Trail Making Test <sup>1</sup>             | Participants draw a line from number to letter in ascending order, alternating between numbers and letters                      | Visual-motor sequencing task; task-switching                                |
|                                         | D-KEFS Color Word Interference Test               | Words written in different colour than word written. Participants switch between reading written word and saying font colour.   | Ability to inhibit a dominant and automatic verbal response                 |
|                                         | CLOX                                              | Participants construct an analogical clock first from memory (CLOX 1), then again by copying the experimenter’s clock (CLOX 2). | Visuospatial processing and planning                                        |
|                                         | Digit Span                                        | Participants recite digit spans first forwards then backwards.                                                                  | Short-term and working memory                                               |
|                                         | Semantic Fluency (Category—animals)               | Participants list as many animals as they can within 60 seconds                                                                 | Lexical access; updating ability                                            |
| <i>Language</i>                         | Boston Naming Test (short form) <sup>1</sup>      | Noun confrontation naming                                                                                                       | Lexical retrieval of imageable nouns (high and low frequency of occurrence) |
|                                         | Northwestern Naming Battery                       | Verb confrontation naming & Verb comprehension                                                                                  | Production and identification of imageable verbs                            |
|                                         | Northwestern Assessment of Verbs and Sentences    | Participants select images that match spoken sentences of varying syntactic complexity                                          | Sentence comprehension                                                      |
|                                         | Pyramids and Palm Trees (short form) <sup>2</sup> | Participants identify which of two objects “goes with” a target                                                                 | Thematic relatedness                                                        |
| <i>Memory</i>                           | Hopkins Verbal Learning Test                      | Auditory learning of a list of 12 words.                                                                                        | Verbal learning and memory                                                  |
|                                         | Brief Visuospatial Memory Test-Revised (BVMT-R)   | Visual learning of 6 different designs                                                                                          | Visuospatial learning and memory                                            |

\*Note: Reference List

<sup>1</sup>Graves, Bezeau, Fogarty, & Blair, 2004; <sup>2</sup>Breining...Hillis, 2015

**S3 Appendix. Visual Stimuli Selection and Editing.**
