# Supplementary material for: Predictive language comprehension in Parkinson’s disease
Source: PubMed Central journal article supplement (PMC9907838; doi:10.1371/journal.pone.0262504), 2023-02-08
Supplement: pone.0262504.s003.pdf [file pone.0262504.s003.pdf]

**S5 Table. Predictive Sentences Practice.**

| <b>Sentence</b>                     | <b>Target</b> | <b>Distractor 1</b> | <b>Distractor 2</b> | <b>Distractor 3</b> |
|-------------------------------------|---------------|---------------------|---------------------|---------------------|
| The maid spreads the blanket.       | blanket       | broom               | icing               | cake                |
| The hunter loads the rifle.         | rifle         | antlers             | groceries           | register            |
| The gambler throws the dice.        | dice          | jackpot             | soccer ball         | goal                |
| The soldier writes the letter.      | letter        | cannon              | experiment          | rocket              |
| The photographer cleans the camera. | camera        | photo               | newspaper           | typewriter          |
| The doctor reads the x-ray.         | x-ray         | injection           | story               | assignment          |
| The butcher wraps the steak.        | steak         | scale               | candy cane          | sleigh              |
| The ringmaster trains the lion.     | lion          | cage                | runner              | stopwatch           |
