# Supplementary material for: Predictive language comprehension in Parkinson’s disease
Source: PubMed Central journal article supplement (PMC9907838; doi:10.1371/journal.pone.0262504), 2023-02-08
Supplement: pone.0262504.s004.pdf [file pone.0262504.s004.pdf]

**S6 Table. Predictive Sentences, Full Trials (Sets 1-12).**

| <b>Audio Sentence</b>                | <b>Target Image</b> | <b>Agent-related distractor</b> | <b>Action-related distractor</b> | <b>Unrelated distractor</b> |
|--------------------------------------|---------------------|---------------------------------|----------------------------------|-----------------------------|
| The fisherman sews the net.          | net                 | boat                            | quilt                            | cradle                      |
| The fisherman rocks the boat.        | boat                | net                             | cradle                           | quilt                       |
| The grandmother rocks the cradle.    | cradle              | quilt                           | boat                             | net                         |
| The grandmother sews the quilt.      | quilt               | cradle                          | net                              | boat                        |
| The boxer fastens the headgear.      | headgear            | punching bag                    | seatbelt                         | brakes                      |
| The boxer hits the punching bag. (H) | punching bag        | headgear                        | brakes                           | seatbelt                    |
| The driver fastens the seatbelt.     | seatbelt            | brakes                          | headgear                         | punching bag                |
| The driver hits the brakes. (H)      | brakes              | seatbelt                        | punching bag                     | headgear                    |
| The baby drinks the milk.            | milk                | bib                             | champagne                        | heels                       |
| The baby wears the bib.              | bib                 | milk                            | heels                            | champagne                   |
| The bride drinks the champagne.      | champagne           | heels                           | milk                             | bib                         |
| The bride wears the heels.           | heels               | champagne                       | bib                              | milk                        |
| The baker rolls the dough.           | dough               | oven                            | sleeping bag                     | lantern                     |
| The baker lights the oven.           | oven                | dough                           | lantern                          | sleeping bag                |
| The camper rolls the sleeping bag.   | sleeping bag        | lantern                         | dough                            | oven                        |
| The camper lights the lantern.       | lantern             | sleeping bag                    | oven                             | dough                       |
| The child catches the football. (H)  | football            | lollipop                        | mouse                            | paw                         |
| The child licks the lollipop.        | lollipop            | football                        | paw                              | mouse                       |
| The cat catches the mouse. (H)       | mouse               | paw                             | football                         | lollipop                    |

|                                             |            |            |            |            |
|---------------------------------------------|------------|------------|------------|------------|
| The cat licks the paw.                      | paw        | mouse      | lollipop   | football   |
| The horse eats the carrot.                  | carrot     | fence      | fish       | waves      |
| The horse jumps the fence. (H)              | fence      | carrot     | waves      | fish       |
| The dolphin eats the fish.                  | fish       | waves      | carrot     | fence      |
| The dolphin jumps the waves. (H)            | waves      | fish       | fence      | carrot     |
| The policeman closes the cell.              | cell       | motorcycle | stable     | horse      |
| The policeman rides the motorcycle.         | motorcycle | cell       | horse      | stable     |
| The jockey closes the stable.               | stable     | horse      | cell       | motorcycle |
| The jockey rides the racehorse.             | horse      | stable     | motorcycle | cell       |
| The lifeguard scans the beach.              | beach      | swimmer    | aisle      | money      |
| The lifeguard saves the swimmer. (H)        | swimmer    | beach      | money      | aisle      |
| The shopper scans the aisle.                | aisle      | money      | beach      | swimmer    |
| The shopper saves the money.                | money      | aisle      | swimmer    | beach      |
| The detective crosses the courtroom.<br>(H) | courtroom  | fugitive   | jungle     | zebra      |
| The detective hunts the fugitive. (H)       | fugitive   | courtroom  | zebra      | jungle     |
| The lion crosses the jungle. (H)            | jungle     | zebra      | courtroom  | fugitive   |
| The lion hunts the zebra. (H)               | zebra      | jungle     | fugitive   | courtroom  |
| The mechanic pours the oil.                 | oil        | tools      | salt       | dishes     |
| The mechanic organizes the tools. (H)       | tools      | oil        | dishes     | salt       |
| The waitress organizes the dishes. (H)      | dishes     | salt       | tools      | oil        |
| The waitress pours the salt.                | salt       | dishes     | oil        | tools      |

|                                     |            |            |            |            |
|-------------------------------------|------------|------------|------------|------------|
| The pilot wears the uniform.        | uniform    | airplane   | overalls   | tractor    |
| The pilot controls the airplane.    | airplane   | uniform    | tractor    | overalls   |
| The farmer wears the overalls.      | overalls   | tractor    | uniform    | airplane   |
| The farmer controls the tractor.    | tractor    | overalls   | airplane   | uniform    |
| The pirate wears the eyepatch.      | eyepatch   | ship       | sunglasses | car        |
| The pirate steers the ship.         | ship       | eyepatch   | car        | sunglasses |
| The chauffeur wears the sunglasses. | sunglasses | car        | eyepatch   | ship       |
| The chauffer steers the car.        | car        | sunglasses | ship       | eyepatch   |
