# Supplementary material for: Predictive language comprehension in Parkinson’s disease
Source: PubMed Central journal article supplement (PMC9907838; doi:10.1371/journal.pone.0262504), 2023-02-08
Supplement: pone.0262504.s005.pdf [file pone.0262504.s005.pdf]

**S7 Table. Baseline Sentence Practice.**

| <b>Target</b> | <b>Distractor 1</b> | <b>Distractor 2</b> | <b>Distractor 3</b> |
|---------------|---------------------|---------------------|---------------------|
| diamond       | hat                 | flower              | beer                |
| guitar        | deer                | ladder              | brick               |
| jacket        | bow                 | dog                 | pine cone           |
| banana        | pan                 | umbrella            | lightbulb           |
| bike          | present             | mushroom            | fork                |
