# Supplementary material for: Predictive language comprehension in Parkinson’s disease
Source: PubMed Central journal article supplement (PMC9907838; doi:10.1371/journal.pone.0262504), 2023-02-08
Supplement: pone.0262504.s006.pdf [file pone.0262504.s006.pdf]

**S8 Table. Baseline Trials.**

| <b>Target</b> | <b>Distractor 1</b> | <b>Distractor 2</b> | <b>Distractor 3</b> |
|---------------|---------------------|---------------------|---------------------|
| helmet        | clock               | balloon             | log                 |
| drum          | bathhtub            | rope                | strawberry          |
| tape          | strawberry          | drum                | helmet              |
| teapot        | fan                 | brush               | drum                |
| bathhtub      | violin              | dress               | slide               |
| lamp          | feather             | strawberry          | truck               |
| feather       | belt                | slide               | teapot              |
| log           | scarf               | fan                 | tape                |
| scarf         | violin              | teapot              | roller skate        |
| slide         | log                 | feather             | balloon             |
| dress         | flashlight          | clock               | mailbox             |
| clock         | fan                 | tape                | shovel              |
| brush         | flashlight          | lamp                | pumpkin             |
| pumpkin       | balloon             | rope                | violin              |
| rope          | teapot              | scarf               | flashlight          |
| shovel        | balloon             | pumpkin             | lamp                |
| mailbox       | strawberry          | truck               | belt                |
| roller skate  | flashlight          | squirrel            | brush               |
| truck         | violin              | shovel              | dress               |
| squirrel      | roller skate        | belt                | fan                 |
