# Supplementary material for: Predictive language comprehension in Parkinson’s disease
Source: PubMed Central journal article supplement (PMC9907838; doi:10.1371/journal.pone.0262504), 2023-02-08
Supplement: pone.0262504.s007.pdf [file pone.0262504.s007.pdf]

**S9 Table. Analyses of PD versus control gaze logits to the target object during predictive sentences.**

|                    | Agent Time Window |             |                | Verb Window     |             |                | Target Window   |             |                |
|--------------------|-------------------|-------------|----------------|-----------------|-------------|----------------|-----------------|-------------|----------------|
|                    | <i>Estimate</i>   | <i>S.E.</i> | <i>p</i> value | <i>Estimate</i> | <i>S.E.</i> | <i>p</i> value | <i>Estimate</i> | <i>S.E.</i> | <i>p</i> value |
| Intercept          | -1.441            | 0.10        | < <b>.001</b>  | -0.353          | 0.11        | < <b>.01</b>   | 0.662           | 0.18        | < <b>.001</b>  |
| Linear time        | 2.342             | 0.20        | < <b>.001</b>  | 0.545           | 0.12        | < <b>.001</b>  | 0.998           | 0.24        | < <b>.001</b>  |
| Quadratic time     | -0.659            | 0.11        | < <b>.001</b>  | 0.061           | 0.05        | 0.270          | -0.295          | 0.08        | < <b>.001</b>  |
| Group (Control/PD) | 0.086             | 0.13        | 0.505          | 0.128           | 0.15        | 0.386          | 0.263           | 0.32        | 0.409          |
| Group x Linear     | -0.216            | 0.28        | 0.440          | -0.061          | 0.18        | 0.730          | 0.318           | 0.35        | 0.360          |
| Group x Quadratic  | -0.020            | 0.17        | 0.903          | -0.112          | 0.11        | 0.305          | -0.078          | 0.13        | 0.555          |

Note: Bolded values are significant at the  $p < .05$  level
