# Supplementary material for: Predictive language comprehension in Parkinson’s disease
Source: PubMed Central journal article supplement (PMC9907838; doi:10.1371/journal.pone.0262504), 2023-02-08
Supplement: pone.0262504.s008.pdf [file pone.0262504.s008.pdf]

**S10 Table. Analyses of PD versus control gaze logits to the agent-related object during the predictive window.**

|                    | Verb Time Window |             |                |
|--------------------|------------------|-------------|----------------|
|                    | <i>Estimate</i>  | <i>S.E.</i> | <i>p</i> value |
| Intercept          | -0.902           | 0.11        | < <b>.001</b>  |
| Linear time        | -0.572           | 0.13        | < <b>.001</b>  |
| Quadratic time     | -0.252           | 0.06        | < <b>.001</b>  |
| Group (Control/PD) | -0.049           | 0.12        | 0.690          |
| Group x Linear     | -0.120           | 0.21        | 0.570          |
| Group x Quadratic  | -0.162           | 0.12        | 0.166          |

Note: Bolded values are significant at the  $p < .05$  level
