# Supplementary material for: Predictive language comprehension in Parkinson’s disease
Source: PubMed Central journal article supplement (PMC9907838; doi:10.1371/journal.pone.0262504), 2023-02-08
Supplement: pone.0262504.s009.pdf [file pone.0262504.s009.pdf]

**S11 Table. Analyses of PD versus control gaze logits to the verb-related object during the combined verb + target window.**

|                    | Combined End Time Window |             |                |
|--------------------|--------------------------|-------------|----------------|
|                    | <i>Estimate</i>          | <i>S.E.</i> | <i>p</i> value |
| Intercept          | -2.266                   | 0.12        | < <b>.001</b>  |
| Linear time        | -0.616                   | 0.35        | 0.079          |
| Quadratic time     | -1.099                   | 0.27        | < <b>.001</b>  |
| Group (Control/PD) | -0.042                   | 0.20        | 0.836          |
| Group x Linear     | 0.114                    | 0.55        | 0.837          |
| Group x Quadratic  | -0.547                   | 0.34        | 0.108          |

Note: Bolded values are significant at the  $p < .05$  level
