# Supplementary material for: Predictive language comprehension in Parkinson’s disease
Source: PubMed Central journal article supplement (PMC9907838; doi:10.1371/journal.pone.0262504), 2023-02-08
Supplement: pone.0262504.s010.pdf [file pone.0262504.s010.pdf]

**S12 Table. Effect of motion content on gaze logits to the target entity during predictive sentences.**

| <i>Fixed Effects</i>         | Predictive Sentences: Fixations on the Target Object |             |                |                 |             |                |                 |             |                |
|------------------------------|------------------------------------------------------|-------------|----------------|-----------------|-------------|----------------|-----------------|-------------|----------------|
|                              | Agent Time Window                                    |             |                | Verb Window     |             |                | Target Window   |             |                |
|                              | <i>Estimate</i>                                      | <i>S.E.</i> | <i>p</i> value | <i>Estimate</i> | <i>S.E.</i> | <i>p</i> value | <i>Estimate</i> | <i>S.E.</i> | <i>p</i> value |
| Intercept                    | -1.486                                               | 0.11        | < . <b>001</b> | -0.351          | 0.12        | <. <b>01</b>   | 0.624           | 0.18        | <. <b>001</b>  |
| Linear time                  | 2.356                                                | 0.22        | < . <b>001</b> | 0.457           | 0.13        | <. <b>001</b>  | 0.953           | 0.26        | <. <b>001</b>  |
| Quadratic time               | -0.609                                               | 0.13        | < . <b>001</b> | 0.011           | 0.06        | 0.865          | -0.342          | 0.09        | <. <b>001</b>  |
| Group (Control/PD Intercept) | -0.003                                               | 0.13        | 0.981          | 0.161           | 0.15        | 0.277          | 0.277           | 0.32        | 0.388          |
| Motion Content (Intercept)   | -0.188                                               | 0.18        | 0.284          | -0.005          | 0.20        | 0.982          | -0.157          | 0.18        | 0.368          |
| Group x Linear               | -0.194                                               | 0.30        | 0.510          | 0.057           | 0.19        | 0.758          | 0.506           | 0.35        | 0.152          |
| Group x Quadratic            | -0.073                                               | 0.19        | 0.703          | -0.211          | 0.13        | 0.098          | -0.030          | 0.15        | 0.842          |
| Motion x Linear              | 0.042                                                | 0.36        | 0.908          | -0.338          | 0.22        | 0.129          | -0.199          | 0.40        | 0.615          |
| Motion x Quadratic           | 0.181                                                | 0.23        | 0.427          | -0.182          | 0.13        | 0.152          | -0.188          | 0.17        | 0.272          |
| Group x Motion (Intercept)   | -0.336                                               | 0.09        | <. <b>001</b>  | 0.091           | 0.08        | 0.261          | 0.034           | 0.07        | 0.646          |
| Group x Motion x Linear      | 0.038                                                | 0.35        | 0.913          | 0.435           | 0.26        | 0.089          | 0.736           | 0.28        | <. <b>01</b>   |
| Group x Motion x Quadratic   | -0.271                                               | 0.33        | 0.407          | -0.411          | 0.25        | 0.106          | 0.237           | 0.27        | 0.386          |

Note: Bolded values are significant at the  $p < .05$  level
