# Supplementary material for: Predictive language comprehension in Parkinson’s disease
Source: PubMed Central journal article supplement (PMC9907838; doi:10.1371/journal.pone.0262504), 2023-02-08

S13 Figure. Looks to target versus distractor images in predictive sentences, in logits.

Looks to target vs. distractor images in predictive sentences

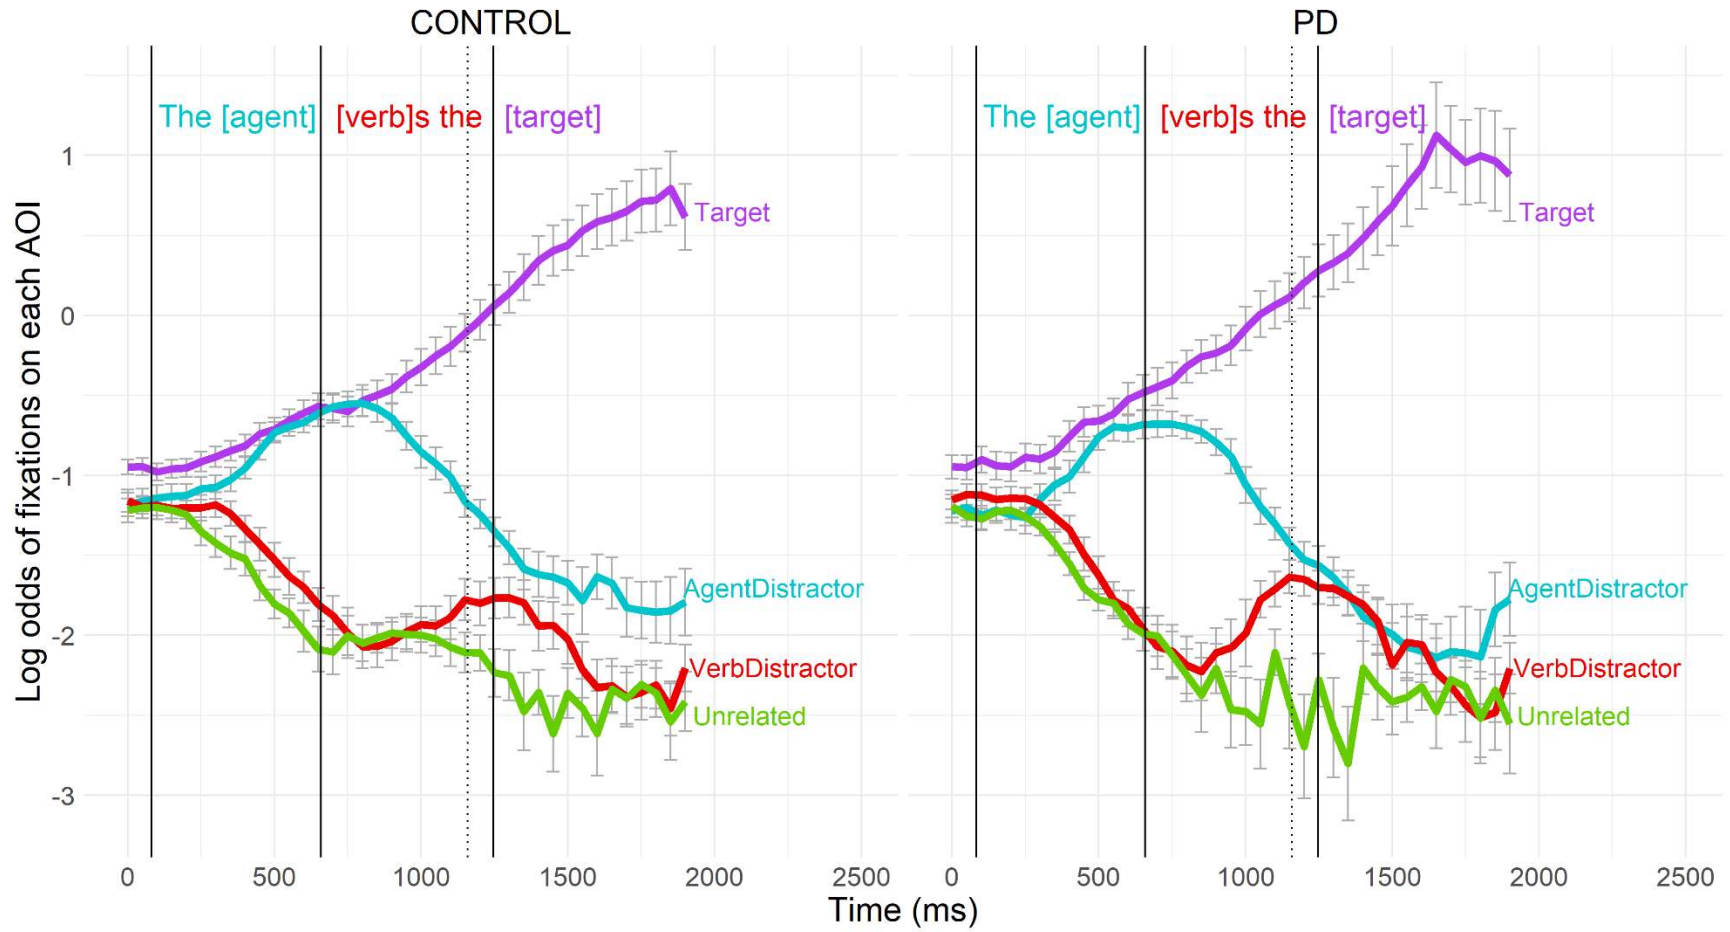

Supplement: pone.0262504.s011.pdf [file pone.0262504.s011.pdf]
